# Supplementary material for: Sex differences in association between tooth loss and socioeconomic status: The 8020 Promotion Foundation Study of Japanese Dental Patients
Source: Research Square preprint supplement (doi:10.21203/rs.3.rs-7418524/v1), 2025-09-30
Supplement: Supplementary file 1 [file 230f0bed7f11ebbea2e60122.docx]

Questions and answers used in this study

| Questions | Answers |
| --- | --- |
| Regarding your family's current financial situation, if the average family is “middle”, please choose the one that applies. Please use your own judgment. | Upper  Upper-middle  Middle  Lower-middle  Lower |
| How many years have you attended school? Please count from the time you entered elementary school. | ≤ 9 years  10-12 years  13-15 years  ≥ 16 years |
| Are you currently working? | Working  Not working |
| If you answered “working,” please answer the following questions.  Which of the following describes your occupation? | Officer/president  Full-time employee (managerial position)  Full-time employee (general position)  Part-time employee  Temporary employee  Self-employed/liberal owner  Other |
| Do you have anyone you can talk to or get help from when you have problems in your daily life or at work? Please select all that apply. | Family  Friends  Colleagues at work  Neighbors  people in hobby or volunteer associations  Others  None |
| Please give me your height and weight. |  |
